# Supplementary material
Source: PubMed Central journal article supplement (PMC6352910)
Supplement: NIHMS1515447-supplement-Video_Legends.pdf [file NIHMS1515447-supplement-Video_Legends.pdf]

## Video Legends

Supplemental Video 1. ATP induces membrane blebbing. ATP (2 mM) induced membrane blebbing of human macrophages. The video shows 1430 s of activity, and ATP was applied at  $t = 40$  s. Scale bar: 20  $\mu\text{m}$ .

Supplemental Video 2. Membrane blebbing reverses after washout of ATP. Macrophage bleb retraction occurred after 20 mins of ATP (2 mM) stimulation, when ATP solution was replaced with fresh ECS at the start of the video. The video shows 1430 s of activity. Scale bar: 20  $\mu\text{m}$ .
